# Supplementary material for: A network pharmacology study on main chemical compounds from Hibiscus cannabinus L. leaves
Source: PubMed Central journal article supplement — RSC Adv. 2021 Mar 17;11(19):11062–82. doi: 10.1039/d0ra10932k (PMC8695834; doi:10.1039/d0ra10932k), 2021-03-17
Supplement: RA-011-D0RA10932K-s001.pdf [file RA-011-D0RA10932K-s001.pdf]

## Supplementary Table S1

### A list of 244 genes in SEA

MAN2B1  
XDH  
TYMS  
QTRT1  
PLAUR  
PAOX  
RR  
DNM1  
ADH7  
TLR8  
PAM  
FDPS  
ADH1B  
CA3  
CES2  
GGPS1  
LPAR3  
GNAI1  
GNAI3  
CA6  
ADH1C  
GNAO1  
CES1  
CA5B  
ADH1A  
SLC22A1  
CA5A  
RELA  
EPHX1  
TLR2  
LAP3  
LPAR2  
CA4  
CA14  
CA7  
SLC22A8  
HAO1  
FAAH  
SPHK1  
GABRQ  
KDM7A  
BBOX1  
CYP4F2  
PHF8  
FOLH1  
GSTK1

### A list of 442 genes in STP

ACHE  
SLC5A7  
LSS  
PYGL  
SLC18A3  
DNM1  
FUCA2  
PLA2G2A  
PLA2G1B  
FUCA1  
GLB1  
MGAM  
GAA  
SI  
GBA2  
UGCG  
GANAB  
GLA  
CDK2  
CDK1  
CDK4  
TYR  
DAO  
GBA  
NAAA  
SIGMAR1  
SLC22A2  
SLC47A1  
GRIN1  
GRIN2A  
CA7  
CA3  
CA6  
CA12  
CA14  
CA9  
CA4  
CA5B  
CA5A  
CA13  
NISCH  
HTR2B  
HTR2A  
HTR2C  
SLC6A4  
KDM1A

NAALAD2  
SLC6A11  
KDM2A  
SLC22A6  
ENPEP  
KDM5A  
KDM4A  
KDM4C  
KDM4E  
GABBR2  
EGLN3  
GABBR1  
KDM5C  
OXER1  
GABRR1  
TPO  
ERN1  
CYP1B1  
TUBB1  
CYP1A1  
NFE2L2  
NQO2  
ENGASE  
MTNR1B  
MTNR1A  
PPARA  
GPR84  
PLA2G4B  
LPAR4  
SLC25A20  
LPAR6  
COL4A3BP  
P2RY10  
ACER2  
MPEG1  
GPR34  
PLA2G2C  
POLM  
PLA2G5  
LPAR1  
GPR174  
FABP3  
BHMT  
SLCO2A1  
S1PR2  
SELL  
CDC25C  
SMPD2  
LTB4R

MAOB  
HTR1B  
MAOA  
RCOR1  
ADRA2A  
HTR1D  
ADRB1  
HTR1A  
HTR1E  
DPP4  
HTR7  
HTR6  
TAAR1  
PAOX  
SLC6A3  
SCN4A  
ADRA1A  
GRIN2B  
AKR1B1  
CA2  
ERN1  
TGM2  
ALDH1A1  
CTSK  
TDP2  
TYMP  
AKR1A1  
PARP2  
AKR1B10  
KDM5C  
KDM4B  
KDM5B  
KDM4A  
CA1  
TLR9  
MTNR1B  
MIF  
NOS2  
TOP2A  
TRPA1  
CYP2A6  
PPARA  
PPARD  
FABP4  
FABP5  
FABP3  
FABP2  
FFAR1  
SLC22A6

ACP1  
SELP  
ENPP2  
HMGCR  
GSTM1  
NOD1  
PLA2G4C  
RARB  
CDC25B  
PTGER2  
EPHX2  
THRB  
GSR  
POLH  
THRA  
TBXAS1  
S1PR3  
CDC25A  
POLL  
POLK  
S1PR4  
NAAA  
PLA2G10  
POLB  
PRKCA  
PLA2G2A  
HSD17B3  
S1PR5  
PPARG  
TBXA2R  
DAGLA  
PTGER4  
PTGIR  
PLA2G4A  
FFAR4  
GSTA1  
PTGER3  
FABP4  
PTGFR  
GPR35  
ATG4B  
PPARD  
S1PR1  
TRPV1  
CNR1  
CPT2  
PTPN7  
SPTLC1  
SPTLC2

CDC25A  
HSD11B1  
UGT2B7  
NR1H4  
CYP19A1  
SERPINA6  
SHBG  
HSD17B3  
G6PD  
GABBR1  
POLB  
PTGER2  
KDM2A  
GABRA2  
GPBAR1  
VDR  
AR  
FNTA  
PHF8  
PTPN1  
PLG  
GSTK1  
FAAH  
PPARG  
TERT  
FABP1  
HSD11B2  
PTGFR  
NPC1L1  
RARG  
RARB  
RARA  
GLRA1  
CDC45  
PTPRC  
HAO1  
RXRB  
RXRG  
RXRA  
CYP26B1  
CYP26A1  
NR0B2  
SCD  
CACNA2D1  
HMGCR  
PTGER4  
CHRNA7  
SAE1  
GRM5

PAFAH1B2  
PDCD4  
MGLL  
ABCC2  
CNR2  
SOAT2  
PRKCE  
SPHK2  
LPAR5  
ALOX12  
TOP1  
ATP12A  
MSR1  
SQLE  
ADH4  
LDLR  
CEL  
KCNQ3  
GLA  
PTPN13  
KCNQ2  
BMP1  
CCND3  
KAT2B  
ASAH1  
POLB  
KAT5  
IARS  
PTPRC  
GABBR2  
KDM4E  
PPM1A  
VEGFA  
PLCG2  
LSS  
FNTB  
FNNTA  
ICMT  
FDFT1  
TTPA  
PHLPP1  
BCHE  
AKT1  
CYP17A1  
NPC1L1  
GPBAR1  
SRD5A2  
SHBG  
SLC10A1

PDE4A  
PDE4B  
SLC16A1  
GABRB2  
GABRG2  
FNTB  
UBA2  
PTPN2  
PTGS1  
PREP  
PTPN6  
PTGES  
CDC25B  
ALOX5  
RORC  
PDE4D  
LTB4R  
TOP1  
CD81  
PRKCH  
NR1H3  
CYP51A1  
PTPRF  
PTGS2  
PTPN11  
CES2  
NR3C1  
TRPV1  
CYP17A1  
ACP1  
PTGIR  
ADORA3  
MAPK3  
PTGER1  
BCHE  
BACE1  
NR1H3  
CNR1  
CHRM2  
SLC6A2  
CYP2C19  
PGR  
SRD5A2  
IDO1  
RORA  
NR3C2  
ESR2  
FFAR4  
ALOX12

ABCC4  
CD4  
GC  
CDC45  
G6PD  
SRD5A1  
SERPINA6  
VDR  
NR1H3  
NR1H4  
AR  
ESR2  
ST3GAL1  
CYP24A1  
RORA  
POLA1  
SLC10A2  
SREBF2  
ESR1  
ABCB11  
CA2  
CA1  
EBP  
CYP19A1  
CYP27B1  
EPHA7  
EPHA2  
EPHA5  
EPHA4  
EPHA8  
EPHB3  
EPHB1  
SHH  
EPHA1  
EPHA6  
ATIC  
NR1H2  
RORC  
EPHB2  
GBA2  
PTPN2  
CD81  
PTPN1  
HSD11B2  
AKR1B10  
PTPN6  
IL1B  
F3  
PLCG1

ATP12A  
RPS6KA5  
PDCD4  
TAS2R31  
PPP2CA  
CYP11B1  
CYP11B2  
LRRK2  
IARS  
TTL  
GSR  
HMOX1  
PRKCA  
BRD4  
BRD2  
ABCC9  
KCNJ11  
CDK5R1  
F2RL1  
MGLL  
DRD4  
AOC3  
ATP1A1  
CDC7  
PSEN2  
PDE10A  
RASGRP3  
LIPA  
CDK5  
PSENEN  
NCSTN  
APH1A  
PSEN1  
APH1B  
ADH1A  
ADH1C  
PARP1  
EPHX2  
NQO2  
SRD5A1  
THRA  
THRB  
GRM1  
MTNR1A  
HRH1  
PTAFR  
HLCS  
ABCG2  
EPHX1

PTPRF  
HSD11B1

MAPK14  
JAK2  
TRPM8  
KIF11  
P2RX7  
NR1I2  
AVPR2  
ADORA1  
ADORA2A  
HSD17B1  
NMT1  
ADH1B  
TNKS2  
TNKS  
CTSL  
CTSB  
SLC6A15  
GRM2  
DRD2  
CYP24A1  
TSPO  
CNR2  
DBF4  
RAPGEF4  
BRD3  
PIK3CA  
PIM1  
ITK  
PIM3  
NAMPT  
CHRNA4  
MMP13  
MMP1  
NPY5R  
CTSD  
KCNA5  
CHRNA2  
GRIA2  
FNTA FNTB  
HRH3  
HRH4  
QPCT  
CPT1A  
STS  
HPGD  
PIK3CG  
PI4KB  
PI4KA  
LDLR

DHFR  
F2R  
PDE7A  
LTA4H  
ALOX15  
ABCC1  
ABCB1  
TBXA2R  
PLA2G4A  
RORB  
MAPK1  
HNF4A  
GABRB3  
LIMK2  
IMPDH2  
C5AR1  
SLC9A1  
ABL1  
YES1  
LCK  
SRC  
EPHB4  
ALOX5AP  
SLC6A9  
KDR  
NTRK1  
HIPK1  
PGGT1B  
GCGR  
AURKB  
ROCK2  
MCL1  
BCL2  
PDE5A  
CASR  
OPRD1  
BRPF1  
CHUK  
PDE6D  
CRHR1  
CSF1R  
KIT  
ABHD6  
SCN9A  
MTOR  
GSK3A  
LIPE  
CD38  
VCP

CALCRL  
PFKFB3  
RAMP1  
GABRA3  
GABRA1  
GABRA5  
PRKCG  
PRKCD  
PRKCE  
PRKCQ  
DHCR7  
PRKCB  
ESR1  
ICMT  
TNF  
ACACB  
ITGAL  
SMO  
MDM2  
CHRM4  
CHRM5  
CHRM1  
CHRM3  
ICAM1  
ITGB2  
SIRT2  
OPRK1  
BDKRB1  
F2  
PAM  
JAK3  
EGFR  
ECE1  
CDK9  
PRCP  
PPM1B  
PPP1CC  
MET  
TGFB1  
CACNA1B  
AVPR1A  
FLT1  
GLO1  
AKT1  
BRAF  
PPP5C  
MAPK10  
NMBR  
FKBP1A



IDH1  
SCARB1  
KCNK3  
KCNK9  
SREBF2  
ELANE  
CYP2C9  
MCHR1  
F10  
CFTR  
NPY1R  
MOGAT2  
GNRHR  
MPO  
DCK  
SYK  
GPR119  
FYN  
PDGFRB  
CCND3  
CCR8  
LIMK1  
ERBB2  
ERBB4  
BDKRB2  
PDE3A  
CCND1  
CCND2  
CCNT1  
TRPV4  
S1PR3  
S1PR1  
LPAR6  
LPAR5  
IL2  
PPP1CA  
S1PR5  
S1PR4  
FASN  
IKBKE  
TBK1  
SQLE  
PHLPP1  
ILK  
CCKAR  
ADK  
AURKA  
JAK1  
PLA2G7

PDK1  
BACE2  
NR1H2  
FDFT1

---

## Supplementary Table S2

**A list of 3,028 genes related to obesity**

---

MC4R  
PPARG  
POMC  
CPE  
AGRP  
SH2B1  
LEP  
LEPR  
PCSK1  
ENPP1  
SIM1  
UCP3  
NR0B2  
BBS4  
MKKS  
BBS1  
CNR1  
CRP  
ESR1  
SIRT3  
SIRT1  
HSD11B1  
IL6  
IRS1  
LBP  
LPL  
CCL2  
ADIPOQ  
ICAM1  
CYP2E1  
F2  
PMCH  
ACSL1  
FOXO3  
GPX3  
HK2  
NPY5R  
CD40  
HADH  
ADRB2  
ADRB3

GLUL  
APOE  
INS  
NPY1R  
GHRL  
INPP5E  
TF  
FTO  
NEIL1  
CARTPT  
ADCY3  
GNAS  
NPC1  
PRKAR1A  
AHR  
SDCCAG8  
MYT1L  
NTRK2  
SDC3  
KCNMA1  
RAI1  
MRAP2  
BBS9  
BBS2  
VPS13B  
AFF4  
HOXB5  
PACS1  
BBS10  
PHF6  
NAMPT  
TTC8  
TMEM18  
BBS5  
GNPDA2  
BBS12  
DPYD  
RMST  
AKT1  
FAAH  
FASN  
NEGR1  
FGF21  
GCG  
GH1  
GNB3  
HCRT  
HTR2C  
IGF2

AQP7  
LDLR  
MC3R  
MMP9  
SERPINE1  
ANGPTL4  
PLIN1  
PPARA  
PPARD  
MKS1  
BBS7  
PRKCH  
PYY  
PTPN1  
TNF  
UCP1  
UCP2  
PNPLA3  
ARL6  
TBC1D1  
HTR2A  
BCHE  
TUB  
KCTD15  
HSPA5  
MIR21  
CIDEA  
PPARGC1B  
ADRB1  
MTCH2  
GCK  
PTGS2  
SREBF1  
ALMS1  
FGFR1  
SAT1  
TNFRSF1B  
NR1I3  
CTSS  
CYP1B1  
HMOX1  
MIR34A  
STS  
SOD1  
TRPV1  
NR1I2  
CD163  
CD68  
CES1

KSR2  
ACACB  
IGFBP2  
NHLH2  
SOD2  
CTF1  
OGG1  
PCK1  
RAPGEF3  
GPX1  
ITGAM  
ACHE  
SLC22A1  
VLDLR  
CEBPA  
ADH1B  
PARP1  
CS  
DDIT3  
ZNF169  
FCGR3B  
FTL  
IDO1  
MIR130B  
MRC1  
PFKFB3  
PRKAR2B  
TFRC  
CA3  
AKR1C3  
ALDH1L1  
PPARGC1A  
LACTB  
COX7C  
CPB2  
APCDD1  
PPM1L  
CYB5A  
ACE  
NQO1  
DRD2  
ECHS1  
ABCA1  
EFNB1  
EP300  
ESR2  
ETFDH  
RAB21  
ZFR2

MTOR  
GFPT1  
GIP  
GLP1R  
MCHR1  
NR3C1  
HMGB2  
ACADM  
IFNG  
IL1B  
IL10  
IL18  
LCN2  
LIPE  
MIR130A  
MIR184  
ME1  
ALDH6A1  
MMUT  
ZFH3  
ACLY  
NOS3  
NPY  
NPY2R  
NUCB2  
ZBTB7B  
ADIPOR1  
DCXR  
ACP5  
CYCS  
FGGY  
CYP26B1  
RARRES2  
RBP4  
SCD  
ATPAF1  
SLC22A3  
SLC22A2  
STAT3  
TGFB1  
TLR4  
UQCRC2  
ADIPOR2  
AKAP1  
CASP1  
GAS7  
PEX11A  
SUCLG2  
SUCLA2

APLN  
WNT3A  
SOCS3  
SLC16A7  
CD36  
ENTPD6  
SIRT6  
SERPINF1  
CPT1A  
SERPINA12  
DRD4  
STK11  
CCKAR  
NR1H4  
HP  
RPS6KB1  
NMU  
GOT2  
LIPC  
PRKCB  
C3  
CDKN2A  
CST3  
AKT2  
IGFBP3  
AR  
NMB  
PNLIP  
CCL5  
ANGPTL6  
CAV1  
MFN2  
NR1H3  
HRH3  
CRH  
ANKRD26  
NNT  
GUCY2C  
JAK2  
ASIP  
NPPB  
PRLH  
BCL2  
SNAP25  
TSC1  
AOC3  
SOCS1  
ALOX12  
GAPDH

GLRX  
HK1  
IGF1R  
SLC27A1  
FADS1  
NOS1  
PON2  
PRKG1  
SREBF2  
NR1H2  
XDH  
CRHBP  
DCN  
CFD  
DRD1  
GABRA6  
PRLHR  
HSD11B2  
ATP5F1B  
KDM3A  
PROX1  
BAD  
PTPRF  
CCL4  
SDC1  
TYK2  
GALP  
NCOA1  
CDKN1B  
ADARB1  
CTSC  
EHD1  
CPS1  
CYP19A1  
DEFB1  
ALB  
FGG  
G6PD  
GIPR  
GJA5  
PCSK1N  
GPR12  
GSTT1  
HMGCS1  
HTR1B  
APOBEC1  
RHOA  
MAPT  
KITLG



MYC  
MYOD1  
MYOG  
NCF2  
NDUFB6  
ATP4B  
OTC  
OXCT1  
ATP5F1D  
PDE3A  
PIK3R1  
PRKCD  
PRKCI  
PLSCR3  
GPAM  
RSC1A1  
BDNF  
ABCG5  
SFTPB  
SFTP1  
SLC9A3  
SLC10A1  
AACS  
BNIP3  
SRD5A1  
STAT4  
C5AR1  
EHMT1  
CAV2  
FADD  
FAIM2  
DMD  
BEST1  
CTNNA1  
LMNA  
SEC16B  
COMT  
ETV5  
APPL1  
PTEN  
HNF1A  
TFAP2B  
EGF  
ARG1  
PRDM16  
NRXN3  
ATP6AP2  
DUSP6  
CADM2

HNFB4A  
MLXIPL  
MAGEL2  
MAP2K5  
RAP1A  
KISS1R  
H6PD  
ABCA4  
SETD2  
HLA-DRB1  
SOX6  
MTMR9  
TBX1  
UBE3A  
HDAC4  
CEL  
LINGO2  
EMD  
PDX1  
ANOS1  
MECP2  
NF2  
PAX6  
WVOX  
WNT4  
LZTFL1  
AHI1  
PROK2  
ABCC8  
TULP1  
KMT2D  
CUL4B  
CEP19  
EIF2S3  
ELN  
ARL13B  
FGFR3  
TRIM32  
FTSJ1  
GATA4  
GLDC  
KCNJ11  
NEUROD1  
PAK3  
TNNI3K  
RAB23  
KIDINS220  
RPTOR  
RFC2

BLK  
SOX2  
SOX3  
WT1  
HESX1  
ARNT2  
MED12  
NR2E3  
ZGLP1  
GHRLOS  
KCNJ18  
BCDIN3D-AS1  
FPGT-TNNI3K  
HUWE1  
LINC01524  
SCN1A-AS1  
TOPORS  
APC2  
SEMA3A  
MERTK  
DEAF1  
LRRC53  
PRPF8  
FARS2  
CETP  
LINC02465  
LINC02055  
PNPLA6  
IFT27  
MID2  
CRYZL2P-SEC16B  
IL1RAPL1  
PNKP  
NLRP3  
ADCY9  
RAB39B  
APOA5  
CLCN4  
CANT1  
CNGB1  
CNGA1  
PROKR2  
ZNF513  
POC5  
HGSNAT  
PTCHD1  
CRX  
SOCS2-AS1  
RDH12

CTSH  
KLB  
C8orf37  
CYP7A1  
DGKG  
DCC  
LRRN4  
ARX  
DLG3  
AGER  
DNMT3A  
DPP4  
AGT  
AGTR2  
EDN1  
MEGF8  
AHSG  
ERBB2  
FABP4  
FABP2  
ACSL4  
FAT1  
JMJD1C  
FGF8  
FHL1  
CNKSR2  
ZNF365  
SNRNP200  
FOXO1  
IQSEC2  
POGZ  
FLII  
SYNE2  
DDHD2  
RPGRIP1L  
TTC28  
SYNE1  
ARHGEF18  
ADNP  
CRB1  
ARL2BP  
PDSS1  
FLRT3  
PRPF6  
FNDC5  
GABPA  
GABRA3  
GABRD  
FSCN2

SIN3A  
NSMF  
COPD  
PRPF31  
IFT172  
MYCBP  
TBL2  
GDI1  
HS6ST3  
RNU1-1  
GHR  
GHSR  
RBMX  
AMY1A  
AMY1B  
AMY1C  
GNAT2  
GP1BB  
TTC28-AS1  
CCDC141  
GPT  
GRN  
GTF2I  
GUCA1B  
SH3KBP1  
HCFC1  
HIF1A  
HLA-DQB1  
HOXB3  
APOA1  
IAPP  
APOB  
FFAR4  
IDH3A  
IDH3B  
EYS  
ZNF81  
IGF1  
APP  
APRT  
KLK3  
IL1A  
IL1RN  
IL6R  
CXCL8  
IL17A  
IMPDH1  
INSR  
ACADVL

ITPR3  
KIF7  
CERKL  
LHFPL3  
KCNH2  
PCARE  
FEZF1  
USP27X  
LIMK1  
EML6  
LINC01122  
CASC15  
ARL3  
HOXB-AS3  
SMAD4  
MAK  
ARVCF  
MFAP1  
NR3C2  
MOG  
MTHFR  
MYH9  
NCAM2  
RERE  
NEK2  
NFE2L2  
NINJ1  
NPHP1  
NRL  
BDNF-AS  
SCAPER  
OTX2  
P2RY11  
PAX4  
PAX5  
IMPG2  
PCDH9  
WDPCP  
INSIG2  
NIN  
PDE4D  
PDE6A  
PDE6G  
PDGFB  
PDE6B  
SUFU  
PIK3CA  
PIK3CB  
PIK3CD

PIK3CG  
PLG  
POLG  
PON1  
PRMT7  
POU3F4  
UGT1A10  
UGT1A8  
UGT1A7  
UGT1A6  
UGT1A5  
ATRX  
UGT1A9  
UGT1A4  
UGT1A1  
UGT1A3  
IL17RD  
CNNM2  
PHIP  
PRKAA1  
POMGNT1  
PRKAA2  
CHD7  
PRKAB1  
WDR11  
ERMARD  
SPATA7  
KIZ  
ANGPTL8  
MAPK1  
KLHL7  
MAPK8  
PRL  
RETN  
MRPS22  
PNPLA2  
PTH  
HACE1  
KIAA1549  
SLC7A14  
SUGP1  
HAMP  
PTX3  
RAP1B  
RBP3  
PRPH2  
REN  
RGR  
RHO

RLBP1  
AGBL5  
ROM1  
RP9  
RP1  
RP2  
RPGR  
RPE65  
RPS6KA3  
RREB1  
SAG  
BGLAP  
SCN1A  
CXorf56  
SEMA4A  
NSD1  
SHBG  
SHOX  
SKI  
UPF3B  
RSRC2  
SLC2A4  
SLC5A2  
SLC6A4  
SLC8A1  
SMARCB1  
SOX10  
SPP1  
BRAF  
SRY  
BRCA2  
BRS3  
SYP  
TACR3  
TAF1  
TBCE  
TBX3  
TCF7L2  
TCOF1  
TSPAN7  
TP53  
HIRA  
TNFSF4  
UFD1  
USH2A  
CLRN1  
KDM6A  
VDR  
VEGFA



CLIP2  
ZNF711  
ZNF41  
CA4  
PRCD  
CACNA1S  
CCDC28B  
TMEM43  
IRX3  
STEAP4  
ZNF408  
ALG13  
RABEP2  
DHDDS  
GLRA3  
IFT74  
CEP290  
SPG11  
ALPK1  
IFT88  
SPRY4  
LAS1L  
USP9X  
TRAPPC9  
FAM161A  
CCDC77  
KLF11  
SLC9A7  
OFD1  
KCNAB2  
SHANK3  
IRS2  
DGAT1  
FGF17  
PROM1  
CCK  
BAZ1B  
AIP  
USP8  
TMEM67  
PRPF4  
PRPF3  
CDHR1  
LRAT  
BBIP1  
REEP6  
NRXN1  
HS6ST1  
ARHGEF6

GDF15  
GTF2IRD1  
CLOCK  
SEC24C  
IFT140  
FRMPD4  
DHX38  
TRIM66  
FGF19  
ZBTB7C  
GCKR  
MSTN  
LPA  
ARSA  
MPO  
NNMT  
BAAT  
SORT1  
CIDEA  
SPARC  
SPX  
IL33  
CMKLR1  
GPBAR1  
GRK2  
EDNRA  
LPIN1  
GAD2  
GCGR  
APOA2  
APOC3  
MIR122  
MIR155  
MAOA  
PHB  
CHDH  
AZGP1  
ACKR3  
SFRP5  
SI  
CASR  
MGAM  
CD59  
CXCR6  
GPR151  
CPT2  
NRG4  
ADRA1A  
ADRA2B

AGTR1  
EPO  
FBN1  
SIRT2  
PCSK9  
AMH  
GPR42  
IL15  
ENHO  
LGALS3  
MIR146A  
MME  
MMP2  
CDKAL1  
LGR6  
MBOAT4  
TNMD  
SSTR4  
THBS1  
TNFRSF1A  
CAT  
LPAR2  
KHDRBS1  
ADAMTS13  
CAPN10  
NISCH  
MGLL  
C1QTNF5  
MRGPRX3  
MRGPRX4  
MAPK14  
CXADR  
OXER1  
DIO2  
EGFR  
F5  
GPRC6A  
ANGPTL2  
LPAR3  
MRGPRX1  
IL37  
ANPEP  
GOLGA6A  
ITGAX  
LECT2  
MIR221  
MIR27A  
VN1R17P  
GPR166P

NTS  
TNFRSF11B  
GAL  
PDK4  
AVP  
RCBTB1  
CHPT1  
TRIB3  
CCND1  
BRD2  
ATXN2  
SGK1  
SLC2A1  
WNT5A  
CNBP  
CAD  
FGF23  
FZD4  
MBD2  
GRAP2  
TRIM13  
AHSA1  
PLIN2  
ADM  
GPR119  
CRK  
F2RL1  
F3  
FKBP5  
NUP62  
RNF19A  
POLDIP2  
SLC17A5  
ANGPT1  
GTF2H1  
HGF  
NR4A1  
HSPA1A  
HSPA1B  
KRT16  
LCT  
ARNTL  
MIR143  
ARR3  
MIR33A  
MGAT1  
MIF  
MSRA  
MTNR1B

MTRR  
MYD88  
OPRM1  
OSM  
OXTR  
DCTN4  
BFAR  
ACP1  
PGR  
CCHCR1  
ITLN1  
APOM  
MAPK3  
NMUR2  
MOK  
ACE2  
BCL2A1  
RENBP  
RORC  
ROS1  
SAA1  
CEACAM1  
BMP4  
SLC5A1  
CXADRP1  
SPG7  
TLR2  
TLR3  
TM7SF2  
VCAM1  
WNT1  
WNT10B  
XBP1  
AIMP2  
MFRP  
SERPINA6  
CCN4  
SQSTM1  
SELENBP1  
XPR1  
IL32  
CD14  
GPR55  
CDH13  
FST  
IGF2BP2  
METAP2  
LOC110806262  
CHI3L1

CNTF  
LYPLAL1  
MAP3K8  
COX8A  
CTLA4  
ADRA2A  
DBP  
DECR1  
SLC30A8  
APLNR  
EPHB2  
ESRRA  
FGF1  
FOXC2  
FN1  
ANKK1  
GC  
GHRH  
SPINK4  
HPGDS  
ANGPTL3  
RABGEF1  
FFAR1  
GPS2  
TBK1  
CXCL2  
A1CF  
ACACA  
HMGB1  
HSPA4  
HSPD1  
IFNA1  
IFNA13  
IGFBP1  
IL2  
INPPL1  
KCNQ1  
KNG1  
ARG2  
KRAS  
C1QTNF12  
MCL1  
MEST  
MGAT2  
COX2  
MTTP  
NFKB1  
NHS  
NM

NPPC  
NOX4  
IL22  
SCLY  
PKD1  
TERF2IP  
MAPK9  
PSMD9  
MIR146B  
CXCL5  
SFTPD  
CRTC3  
SNRPN  
TFAM  
TMPRSS2  
TPD52  
TWIST1  
VGF  
TRPM8  
CALCR  
SESN2  
SYVN1  
DGAT2  
DLK1  
CREG1  
PTER  
ABCG2  
CD38  
CD44  
FOXO6  
LINC01672  
PTPRU  
LRPPRC  
CDK4  
GDF11  
LOC102723407  
PERCC1  
SORBS1  
POSTN  
EBP  
MTCO2P12  
CHGA  
FSTL1  
SLC6A14  
C1QTNF6  
CISH  
LEAP2  
ACVR1C  
CREBBP

CX3CR1  
CYBA  
CYBB  
DDT  
DNMT1  
NR0B1  
EIF4EBP1  
ESRRG  
ALDH1A1  
MMRN1  
AKR1B1  
ZFPM2  
FOS  
BACE1  
ALOX5  
FSHR  
NR5A1  
CERS6  
NOCT  
HSPA12A  
SPAG8  
GAS6  
GGT1  
PDCD4  
ANGPT2  
FFAR2  
REM1  
KLF15  
PYCARD  
GSTM1  
GUCA2B  
RMC1  
PSAT1  
CFH  
HOXA5  
HTR2B  
APOA4  
HCAR2  
APOC1  
LCE1C  
FAS  
IL1R1  
IL4  
IL6ST  
CXCL10  
INSIG1  
INSRR  
IRF5  
IRF6



KCNK3  
GFRAL  
C1QL3  
LIPA  
LOX  
LRP5  
MIR126  
MIR148A  
MIR199A1  
MIR199A2  
MIR223  
MIR26B  
SMAD3  
MBL2  
MMP1  
MMP3  
ATF4  
NDN  
NDUFAB1  
CCN3  
OLR1  
PRKN  
TAS2R13  
PC  
SOST  
PDE3B  
GPRC5B  
ARID4B  
ABCB1  
PLA2G1B  
LEPROT  
MEG3  
PPY  
APOBR  
CTNBL1  
LRRC8A  
TAS2R38  
MIR181D  
ARRDC3  
UBL5  
SLC25A19  
RNASEL  
S100A9  
SCN10A  
NOD2  
SELENOP  
SFRP4  
HIF3A  
SLC6A3

SLC6A8  
GGTLC5P  
BRCA1  
SST  
STAT5A  
STAT5B  
SULT2A1  
ADAM17  
BTF3P11  
SNORD116@  
TH  
THY1  
TLE3  
TLR5  
TSHR  
CAPN5  
TST  
TTN  
GGTLC3  
GGT2  
CCR2  
GGTLC4P  
VPS51  
VWF  
TFEB  
CALCA  
HDAC11  
NR4A3  
MOGAT2  
CALR  
NRIP1  
ARID1A  
MCHR2  
FAM71F1  
OGT  
APOL1  
TSLP  
LGR5  
HDAC3  
PER2  
CD1D  
CD5L  
MSC  
KL  
IKBKE  
LPIN2  
RAPGEF5  
BMS1  
IP6K1

MED13  
ADA  
C20orf181  
CD24  
BCL2L11  
MIR1275  
AAA1  
DNM1L  
BED  
TOB1  
SORBS3  
CDK6  
PRG4  
AP3S2  
CDKN1A  
CBSL  
CDKN2B  
HMG20A  
CEACAM5  
LARP1BP2  
RNU6-392P  
CCL27  
HPSE  
NPFFR2  
GPR83  
MTMR11  
SLC27A2  
ADCY5  
NUDT3  
CHIT1  
PRRT2  
CHRM2  
CHRNA2  
CHRNA3  
CHRNA5  
ADCY8  
UCN3  
CHRNA4  
C1QTNF1  
THEM4  
ANTXR2  
CLU  
CCR5  
COL6A3  
RBM45  
COMP  
COPA  
COX4I1  
CP

CPT1B  
CRABP1  
CREB1  
CREM  
FUNDC1  
CRY1  
HT  
CSF1R  
IL34  
CCN2  
CTSK  
CCDC80  
CUX1  
CYP1A1  
CYP1A2  
CYP2A6  
LINC00689  
CYP2B6  
CYP2B7P  
CBLL2  
CYP27A1  
DAG1  
DBI  
SGMS2  
ACAN  
ATN1  
RCAN1  
TSC22D3  
DSPP  
DUSP1  
EGR1  
AIF1  
ELANE  
CRTC2  
ENPEP  
PRSS55  
EPAS1  
ERG  
ERN1  
FBL  
F13A1  
ALDH2  
PTK2B  
FCGR2B  
FDXR  
GPC4  
FGB  
FGF2  
FGF5

FGF10  
FGF13  
FGL1  
FKBP4  
ATF6  
NT5C2  
KDM4B  
FOXO1  
ZNF423  
FLT1  
RRS1  
FMO3  
NEDD4L  
CRTC1  
PADI4  
SMUG1  
DAPK2  
PPP1R15A  
PLA2G15  
CADM1  
ALOX5AP  
PANX1  
ZNF318  
G6PC  
BRWD3  
GABRA2  
BAMBI  
ASPM  
PTPN22  
AMD1  
GEM  
GFAP  
GFER  
HAVCR1  
GJA1  
AMPD1  
GJA4  
ACAD8  
GK  
GLB1  
SGSM3  
GLO1  
GNRHR  
GPD1  
CXCR3  
HCCAT5  
METRNL  
LPAR4  
GPER1

RGMB  
SLC27A6  
SCG3  
CD274  
GSTP1  
REPIN1  
NPC1L1  
ANXA1  
H2AX  
ANXA2  
HFE  
HHEX  
HOXD13  
HSF1  
HSPA2  
HSPG2  
TNC  
C1QTNF9  
IDE  
IFNB1  
APOD  
IGFALS  
IKBKB  
IL13  
ING2  
ISL1  
EIF6  
JAK3  
GSTK1  
MALAT1  
KISS1  
KRT7  
KRT18  
RTL1  
LCAT  
LINC01194  
MIR107  
MIR10B  
MIR141  
MIR152  
MIR15B  
MIR200B  
MIR222  
MIR23A  
MIR29A  
MIR32  
MIR96  
SMAD2  
MAF

MAS1  
MC1R  
MC5R  
DNAJB9  
MDK  
MFAP2  
ASCL1  
MMP14  
EIF2AK4  
MIR342  
ASPA  
PLF  
RNR1  
MUSK  
ATF3  
NFATC3  
NFE2L1  
NGF  
NNAT  
NOS2  
NPPA  
MIR425  
ATP5F1A  
ORM1  
PAEP  
REG3A  
SERPINA5  
ABHD5  
HSPA14  
DNAJC27  
TNFRSF12A  
IL23A  
KLF13  
ENPP2  
LUC7L3  
PECAM1  
PER1  
PFKP  
PGC  
PGF  
SERPINA1  
PIN1  
PKM  
PLA2G4A  
PLAG1  
PLAT  
TM6SF2  
PLTP  
PTOV1

PON3  
APPL2  
QRSL1  
LGR4  
PRCP  
PREP  
SLC30A10  
PRKCA  
SELENOS  
ACSS2  
MYDGF  
MAPK10  
MAP2K3  
PROC  
PROS1  
METTL3  
CCL28  
TMPRSS15  
SUCNR1  
ATP10D  
ABHD6  
MIR519D  
ARHGAP21  
CFAP97  
PTPN2  
IL21  
RAPSN  
GER  
SENP2  
RGS2  
BDKRB2  
S100A8  
S100B  
SAA2  
ACSM3  
BGN  
CCL11  
CCL19  
CCL20  
THADA  
SELP  
SELPLG  
XYLT2  
CARD9  
SETMAR  
SFRP1  
HHIP  
PYY3  
SHC1



CERK  
P2RY12  
IL25  
BMP2  
PINK1  
SLC2A2  
SLC6A2  
NCF1  
SLC15A1  
BMPR1A  
SLN  
SNRNP70  
SOD3  
SORL1  
MAP3K7  
TAL1  
TAZ  
TBX15  
MIR532  
TCF21  
TEK  
TERF1  
THBD  
THRB  
THRSP  
TIMP1  
TIMP3  
C1QBP  
TPH1  
CRISP2  
C3AR1  
TRH  
TRPC1  
TRPM2  
TNFRSF4  
PLIN4  
TYRP1  
UCN  
UROD  
USF1  
VIM  
VIP  
WFS1  
XRCC1  
CXCR4  
VKORC1  
METRN  
PRRC2A  
PLA2G7

MUL1  
DHX40  
ADM2  
WDR26  
FLAD1  
AAAS  
TLR10  
TAM  
CAST  
CASP3  
ROPN1L  
PLA2G6  
SGIP1  
ATRN  
IL1F10  
SPZ1  
ACCS  
DGKE  
TNFSF11  
KLF7  
TNKS  
TNFSF14  
TNFSF10  
CBS  
SOCS2  
CCN5  
KAT2B  
SPHK1  
ARTN  
CCT  
CLDN10  
SLC39A13  
NLRP12  
NOG  
CD8A  
KLF4  
SLIT2  
PIG  
SLC22A8  
LIPG  
ATG5  
MAGED1  
LITAF  
TBPL1  
NPEPPS  
GDF3  
ABCG1  
RGS6  
KEAP1

DNAJC6  
TBC1D4  
MVP  
CDH2  
AKT3  
MIR675  
TANK  
ZSCAN30  
VTRNA2-1  
MIR374B  
MUPP  
HDAC6  
DIP  
ENDO1  
IBD20  
INSL5  
WAGRO  
BOP  
MIR1908  
TMED7-TICAM2  
CHAF1A  
PARP2  
GJC1  
LY75-CD302  
TMX2-CTNND1  
DEL11P13  
KLRC4-KLRK1  
COMMD3-BMI1  
ABCC5  
MIR4777  
MIR4460  
MIR4443  
MIR4517  
BIRC6-AS1  
CDH11  
PPIF  
PGR-AS1  
OPN1MW3  
LSINCT5  
BCAP31  
FAM13A  
TRIM28  
WASF2  
DHRS9  
RBM6  
LINC01412  
MACORIS  
RNF41  
CDK5

CALCRL  
ANGPTL7  
TRIB1  
PLIN3  
RCAN2  
CDK8  
SPRY1  
IRX5  
RAMP2  
RAMP3  
LOC102724197  
LOC102724971  
RTN3  
AKR1A1  
KLF2  
CITED2  
CEPT1  
PEMT  
PIAS3  
YAP1  
ERICD  
IFI30  
OLFM1  
CDX2  
TOMM40  
MAD2L2  
TIMM44  
SLC9A6  
NCOA2  
SEMA4D  
CEBPB  
SEMA3C  
CEBPD  
KAT5  
HYOU1  
ZNRD2  
THRA1/BTR  
LINC00237  
PRDX4  
ARL6IP5  
AGPAT2  
SLC35A1  
OLFM4  
DPYSL4  
LRP1-AS  
TXNRD2  
SCGN  
RGS14  
CAMKK2

CST12P  
RN7SL263P  
CELF1  
SIRT1-AS  
CGRRF1  
DCTN6  
GNA13  
TNFSF13B  
CETN1  
POLD3  
ORI6  
OGA  
NFAT5  
NES  
CFTR  
SEPTIN9  
CCR9  
WASF3  
PPP1R13L  
LILRB1  
ADAM28  
USP19  
CEACAM8  
MRPS30  
UTS2  
PAPOLA  
PRDX3  
FERMT2  
SDS  
SLC27A5  
SLC27A4  
RIPK3  
CHD2  
RAPGEF4  
STIN2-VNTR  
ADAMTS5  
PRDM4  
CHEK1  
WDHD1  
MAP4K5  
IRAK3  
AKAP13  
KLHL2  
VSIG4  
PDAP1  
TUSC2  
OIP5  
SYNPO  
CHRNA4

DBA2  
TXNRD3  
SORCS1  
OSBPL11  
C1QTNF3  
C1QTNF7  
HAUS1  
H3P23  
H3P10  
SLC5A11  
ADCYAP1  
SLC22A12  
ABHD15  
LRG1  
AGAP2  
FTSJ3  
RLN3  
TWIST2  
CLCN3  
MSS51  
CLCN7  
GSTO2  
CLK2  
CLN3  
CLTA  
TPH2  
CMA1  
SPPL3  
CCR6  
CCR7  
ACKR2  
IQCK  
ZNF543  
CPT1C  
COL1A1  
OSCP1  
COL4A1  
COL6A1  
COL9A3  
COL12A1  
CORT  
SLCO6A1  
ADORA1  
TAAR1  
ADORA2A  
ADORA2B  
KLF14  
CPN1  
CPN2

GPAT4  
MAGEC3  
CRHR2  
MAGEE2  
ADORA3  
CRMP1  
S100A16  
TRIM69  
MACROD2  
CRY2  
CSE1L  
PIWIL4  
CSF2  
CSF3  
CSK  
CDAN1  
CSTA  
LYPD4  
TICAM1  
CILP2  
ATP8B3  
CREB3L4  
HJV  
PM20D1  
CTNND1  
PHETA2  
CTRL  
CTSB  
PLB1  
ZNF385B  
ERFE  
CTSL  
XXYLT1  
CNTN4  
PAQR3  
CREBRF  
SLC2A12  
VKORC1L1  
KCTD7  
CYP2C9  
CYP2D7  
CYP2D6  
CYP3A4  
CYP11A1  
CYP17A1  
CYP21A2  
CYP24A1  
SLC35G1  
CYP27B1

DACH1  
DAPK3  
MARCHF10  
AKR1C2  
TMPRSS6  
AAVS1  
NLRP6  
DIH1  
DIO1  
DNAH8  
DOCK2  
DPT  
DRD5  
DUSP5  
DUSP9  
E2F1  
ECT2  
EDNRB  
PGAM5  
EIF2S1  
DCP1B  
ARID2  
METTL21C  
MLKL  
EIF4E  
EIF4EBP2  
ELAVL2  
A2M  
PIKFYVE  
SPRED2  
CRYBG1  
TAPT1  
ENO2  
CCDC171  
ERBB4  
ERCC2  
ERCC4  
ESRRB  
ETFA  
ETV3  
EZH2  
F2R  
F2RL2  
F9  
F10  
F11  
FABP3  
FANCB  
MTIF3



FAT2  
TMEM26  
FCGR1A  
MARCHF8  
FCGR3A  
PHACTR1  
HOXA11-AS  
THSD7A  
FDFT1  
FDPS  
FES  
VASH1  
MLXIP  
ALDOB  
KLRK1  
RAB18  
FOXC1  
WDTC1  
CAND2  
KDM4C  
KDM6B  
FLNA  
GPD1L  
PASK  
FLNC  
NBEAL2  
FLT3  
SIK2  
PHLPP1  
PSD3  
SIK3  
DICER1  
SIRT5  
SIRT4  
NCS1  
MLYCD  
TARDBP  
OTP  
TRAM1  
SEC14L2  
DDAH2  
FPR2  
AMACR  
MKRN1  
LY96  
DIANPH  
ALOX15  
PELI3  
IL27

FSHB  
ALPL  
FYN  
ANGPTL5  
SLC37A4  
GABPB1  
NPNT  
TCERG1L  
GCA  
SPDEF  
TAF5  
GALE  
PRDX5  
MOB4  
GALR1  
POC1A  
AMBP  
GALNT2  
SGMS1  
GEMIN5  
EGFL6  
SNED1  
GORASP2  
ZZZ3  
ACOT11  
IS1  
DNM3  
CFAP61  
KIFBP  
GATA2  
FBXO3  
GCH1  
NUPR1  
OPN1MW  
GCY  
GDF2  
GDF10  
TAS2R12P  
HCA1  
NAP1L5  
GFI1  
GH2  
FETUB  
GJA3  
NPTN  
GJA8  
MLH3  
NOX1  
FOXP1

INTU  
NAAA  
GLS2  
HCAR1  
SIT1  
TMEM97  
STK39  
MCAT  
GLI1  
DESI1  
GLI2  
MAT2B  
GM2AP1  
GNA12  
GNAQ  
AMY2A  
GNRH1  
ABO  
AMY2B  
GOLGB1  
IFNL3  
IFNL1  
JAKMIP3  
H19  
OR10A4  
UTS2R  
HID1  
CCDC57  
CAVIN1  
RSPO1  
DLL1  
FLJ33534  
PNPLA1  
GPR35  
GPR39  
FFAR3  
GRK4  
GRK5  
ANK2  
GPX4  
GRB14  
FLVCR1  
MCTS1  
NOB1  
GRIN1  
PHPT1  
MYLIP  
BRD7  
LGALS13

CXCL1  
GRP  
GSK3A  
GSK3B  
GSR  
GSTA4  
MSH6  
GTF3A  
GUCA2A  
TRPM5  
HOOK2  
MDFIC  
GUCY2D  
NXPH1  
HADHA  
HAS2  
HDAC2  
HEXA  
PLA2G2E  
SOCS7  
NRG1  
ANXA6  
HLA-B  
HLA-DRB3  
HMBS  
FOXA2  
HNRNPA1  
HNRNPH1  
HOXC9  
HOXC10  
APC  
HPR  
AIRE  
HES1  
BIRC2  
HSD17B1  
BIRC3  
HSPB1  
HSP90AA1  
APLP2  
HTR1D  
HTR3A  
HTR6  
IARS1  
GPIHBP1  
ICAM3  
ID1  
ID3  
STING1

SLC35D3  
IFI27  
MCIDAS  
IFNGR1  
GNAT3  
SLC35B2  
IGFBP7  
CCN1  
LCE1A  
TICAM2  
IL1RAP  
IL2RB  
IL5  
IL9  
IL10RA  
IL16  
TNFRSF9  
ILK  
IRF1  
AQP9  
IRF3  
IRF4  
IRF7  
ABCC6  
ITGAD  
ITGB2  
ITGB6  
ITPR2  
ASPG  
KCP  
KCNJ5  
KCNJ13  
USP17L2  
KHK  
KIR2DL1  
KIR2DS1  
KIR3DL1  
KIR3DL2  
CHKB-CPT1B  
SUMO4  
THEMIS  
KRT31  
ACAT2  
RND3  
LALBA  
UOX  
USP17L9P  
LETM1  
LGALS1

LIF  
LNPEP  
LOXL2  
LRP1  
LRP2  
LTA  
CYP4F3  
LTBP3  
LUM  
CD180  
LY75  
MIR125A  
MIR132  
MIR136  
MIR140  
MIR144  
MIR145  
MIR149  
MIR150  
MIR17  
MIR192  
MIR19B1  
MIR200A  
MIR203A  
MIR204  
MIR210  
MIR216A  
MIR22  
MIR23B  
MIR27B  
MIR28  
MIR296  
MIR30C1  
MIR30C2  
MIR30D  
MIR31  
MIR320A  
NBR1  
TNFSF12-TNFSF13  
ARRB2  
SMAD6  
MAOB  
MARK1  
ARSD  
MARK3  
DNAJB3  
MBP  
MC2R  
ADAM11

MDM2  
MEFV  
MAP3K3  
MAP3K5  
MGAT3  
ASAH1  
MIP  
MLH1  
MMP12  
MMP15  
MMP19  
CD200  
PLIN5  
EEF1A1P11  
BECN2  
MIR324  
MIR326  
MIR335  
MIR374A  
MSH2  
MSN  
MST1R  
MT1B  
MT2A  
ATP6  
CYTB  
MTHFD1  
ND1  
MTR  
MUC1  
MYCL  
MYH6  
MYH7  
MYL2  
NCAM1  
NCK1  
ATIC  
ATM  
NEFL  
NFYA  
NMBR  
NOTCH2  
ATP2A2  
NPR1  
ATP2A3  
NRF1  
NTSR1  
NR4A2  
CISD2

MIR361  
MIR377  
MIR378A  
MIR379  
MIR383  
MIR423  
MIR424  
OMG  
OPRD1  
P2RX7  
P2RY2  
P4HB  
G0S2  
NOX3  
DELEC1  
SERPINB2  
PAM  
CNTN3  
NEUROG3  
ASAP1  
TAS2R14  
F11R  
PDE11A  
FOXP3  
TMED7  
PCK2  
APH1A  
PCNA  
SLC45A2  
MZB1  
RXFP3  
KCNK9  
TLR8  
RSRC1  
PDC  
PDCD1  
DACT1  
TAOK3  
ATP5F1E  
PDE4B  
PRKAG2  
DCDC2  
SIRT7  
LSR  
PDK1  
PDK2  
ACSL5  
PEG3  
ADA2



PEX1  
SLC25A3  
PHF2  
SERPINA4  
PIM1  
PITX3  
PKHD1  
PLA2G2A  
PLA2G5  
PLAGL1  
PLAU  
PLCB2  
LRP1B  
PLD1  
PLEK  
PLK1  
PLOD2  
PLXNA1  
PMAIP1  
PNOC  
GPR84  
RAB4B  
CNTN5  
PRRX1  
ATP7B  
FAM3B  
POLE3  
NANS  
TREM2  
TREM1  
SLC38A2  
RETREG1  
XRN1  
KRT20  
RNF216  
EXOSC4  
ROBO4  
POU3F2  
DDIT4  
EGLN1  
POU5F1  
ARL15  
RBFOX1  
PPIA  
PPIB  
PPID  
QPCTL  
VPS13C  
CASZ1

CYP2W1  
TMEM160  
PLAAT2  
ULK4  
ACP3  
MARCHF1  
PID1  
ATG16L1  
MTPAP  
PRMT6  
NUDT11  
AVPR1A  
PPP2R2A  
MOB1A  
PSPC1  
PPP2R5C  
AVPR1B  
LARP6  
LAPTM4B  
IMPACT  
NPY4R  
PRB1  
MIR31HG  
MIR429  
MIR448  
SAGE1  
PLXNA3  
MIOX  
BMP2K  
STAP2  
ZNF407  
HIF1AN  
VPS35  
CNDP2  
SEPTIN11  
MBD5  
MCTP2  
ADCY10  
DOK5  
CENPJ  
EAF2  
CISD1  
PSENEN  
PRKD1  
LMO3  
PRKCZ  
CMAS  
PRKDC  
SULF2

MAPK7  
MAP2K6  
EIF2AK2  
ANKH  
PRNP  
PROP1  
GPCPD1  
PARD3  
RELN  
KLK7  
SLC2A9  
ASAH2  
PSEN1  
PSG5  
SPHK2  
CELF4  
SEMA3G  
ARNTL2  
PSMB6  
DUSP22  
RGMA  
SLC12A9  
RPGRIP1  
TIGAR  
LPAR5  
CD248  
ATP10A  
PTCH1  
PTGDR  
PTGDS  
JPH3  
MIR20B  
AS3MT  
SLC24A3  
PTGS1  
MIR496  
MIR522  
AHRR  
ZNF608  
NLGN2  
SEMA6A  
LRRN1  
CHD8  
MAGEE1  
CPNE5  
DENND1A  
METTL14  
PTPN6  
MARK4

CCAR2  
PTPN11  
PTPRB  
PTPRC  
PTPRE  
PTPRJ  
PTPRS  
PTBP2  
PVALB  
CXCL16  
NLRC4  
BCAT1  
BCAT2  
RAC1  
RASA1  
RASA2  
TRPV4  
ALOXE3  
RBMS1  
REG1A  
RGS4  
ACTB  
FAM3A  
RNASE2  
BCL6  
EXOC4  
ELOVL5  
CPAT1  
GAS5  
TNFRSF17  
ROBO1  
ROCK1  
OPN1SW  
RPL10  
RPL11  
RPL29  
BCS1L  
DELYQ11  
MIR483  
RPS19  
RRAS  
RYR2  
S100A4  
S100A6  
S100A7  
S100A12  
CFB  
SAA3P  
TSPAN31

MSMO1  
CCL3  
BHMT  
CCL7  
CCL8  
CCL14  
CCL17  
CCL18  
CCL22  
BID  
CXCL11  
CX3CL1  
SDC2  
CXCL12  
UBE2O  
DMRTA1  
SEL1L  
SELE  
NPVF  
SELENOW  
MAP2K4  
SFPQ  
SFRP2  
POU5F1P3  
SRSF1  
TRA2B  
BLVRA  
MTMR14  
SCG5  
SH3GL1  
POU5F1P4  
CLEC7A  
EBF2  
NUCKS1  
BMI1  
ST6GAL1  
ST3GAL2  
AIDA  
RFX7  
PPP1R3G  
NDRG4  
NBEAL1  
WNK1  
SLC2A3  
SLC2A5  
SLC5A5  
RPL7P9  
SLC6A12  
SLC12A3

SLC16A1  
SLC19A1  
BMPR2  
SLPI  
SNAI2  
SMARCA2  
STK33  
SMO  
SMPD1  
SNCA  
SNCG  
FSCN1  
SOAT1  
DST  
SPI1  
SPINK1  
SPTA1  
SPTBN1  
SRC  
ITPRID2  
SSTR2  
ST2  
ST13  
ZFP36L1  
STAT1  
STAU1  
STC1  
SULT1E1  
STXBP3  
SULT1A1  
SUV39H1  
SYT4  
TAC1  
TAC3  
TADA2A  
TAT  
TBL1X  
TBXA2R  
TCEA1  
HNF1B  
MIR33B  
MIR551B  
MIR593  
MIR634  
TCN2  
BUB1B  
TFDP1  
TFF2  
TFF3

TGFB3  
TGFB2  
THBS2  
TSPO  
THRA  
TIE1  
TIMP4  
TSPAN8  
TNNI3  
TP73  
NR2C2  
TRAF6  
TRP-TGG3-1  
TRPC3  
TRPS1  
MIR652  
TTR  
MCHR2-AS1  
USP17L24  
USP17L25  
POTEF  
USP17L26  
USP17L27  
TUFM  
USP17L28  
USP17L29  
USP17L30  
OPN1MW2  
SERF1B  
TYRO3  
UGT1A  
UTRN  
VAV2  
VEGFC  
WAS  
LAT2  
WNT7A  
WRN  
YY1  
YWHAZ  
ZFP36  
CFAP410  
CA5A  
MIR758  
ZBTB16  
ZNF214  
PRDM2  
MOGS  
FZD5

SEMA3B  
NABP2  
REEP5  
ASPSCR1  
ELOVL6  
APOO  
MBOAT7  
LAP  
PPP1R3B  
FN3KRP  
GHS  
TBL1XR1  
CARF  
CSPP1  
MAP9  
RIN3  
CALD1  
DOCK5  
PTGES2  
ASRGL1  
SPSB1  
FUZ  
LHX3  
LPAL2  
ADAM12  
MFAP5  
ITIH5  
CMIP  
HMGA2  
WNT5B  
CAMK2A  
SLC38A1  
CAMP  
GDF5  
NCOA3  
BAS  
CAPN1  
CAPN2  
CAPN3  
CAPNS1  
NAA10  
TKTL1  
SERF1A  
PICALM  
BRAP  
ARHGAP24  
PARP9  
ITCH  
LOH19CR1



TMTC1  
IMMP2L  
ADGRV1  
TAGLN2  
HORMAD1  
ULK1  
CASP8  
POLR1B  
MEHMO  
MAF1  
CHCHD5  
NCK2  
DOC2B  
HOPX  
COL25A1  
ZGPAT  
ZNF469  
CNDP1  
GPAT3  
PERM1  
RAX2  
MFSD2A  
SLC35B4  
CYP4F2  
ABCC11  
LGALS12  
HELZ2  
TSPYL5  
MAPKAPK5  
BHLHE40  
PIAS1  
DENR  
PDXK  
RUNX1  
RUNX1T1  
UNC5C  
PDE5A  
SLC4A4  
STX16  
BECN1  
TNFRSF25  
ADAM19  
CBR1  
TNFSF12  
TNFSF9  
TRIM24  
FGF18  
CES2  
NRP1

HCAR3  
ASAP2  
LDB1  
PER3  
CCKBR  
KRIT1  
EIF2S2  
ACTN3  
SNURF  
WASF1  
CCNE1  
SIGLEC12  
UCN2  
SCRN2  
MCU  
TBL1Y  
PYGO2  
USP10  
CERS5  
PCSK7  
ZBED1  
SLC33A1  
LRRFIP1  
GGTLC1  
AURKB  
UBE2L6  
GPR50  
DHRS3  
SLC38A5  
S1PR2  
MS4A1  
PRDM6  
B4GALT5  
SNAP29  
SLC22A6  
LONP1  
SFXN1  
FADS2  
PPP1R14A  
NCR2  
GSTO1  
AIM2  
MAP4K4  
CD33  
LY86  
CHST3  
STX8  
SCARB1  
SCARB2

ADAMTS1  
GAL3ST1  
ENTPD1  
BAG3  
PTGES  
CXCL14  
MRPL33  
VPS26A  
BCAR1  
NR1D1  
PREPL  
WTAP  
CD47  
NCOR1  
CD48  
CD69  
EDEM1  
PUM1  
CD74  
SEMA3E  
CD79A  
SART3  
CD81  
KMT2B  
PIZO1  
CDK1  
MELK  
GAB2  
C2CD5  
SGSM2  
SEC16A  
KBTBD11  
LPGAT1  
THRAP3  
CDC42  
KCNE2  
GLP2R  
HAP1  
ACVR1  
CEP350  
DCAF1  
NCOR2  
JCAD  
RAB11A  
RPAIN  
YWHAG  
RUBCNL  
RIPK1  
LMF1

MMD  
CHTOP  
ARID5A  
PACERR  
FGFR1OP  
ANIB1  
NCAN  
SYPL2  
NFATC1  
AGFG1  
LAMB3  
AQP4  
CNR2  
BCKDHB  
ZNF771  
SNORA73A  
MIR412  
NLK  
PTPRN2  
ARID5B  
LIMD2  
TMEM134  
LINC00839  
ARHGEF2  
PDE8B  
AKTIP  
GPX6  
RRAS2  
SKA1  
HCP5  
CTPP  
MIR642B  
MIR1203  
RAMP2-AS1  
CNP  
CORD1  
NMS  
GYS2  
GPX5  
IMPDH2  
LMX1B  
KCNC2  
ITIH4  
TP63  
POTEM  
POTEKP  
SRI  
FHL5  
CD27

PCLAF  
CD19  
MAGT1  
INO80B  
MKRN3  
ACTG2  
ACTG1  
MET  
ALPI  
EEC1  
SERPINA3  
ACOT7  
ALPP  
ACTBL2  
MAP6  
CECR  
AGTRAP  
RIT2  
GPR162  
MAN1B1  
SETD5  
RNPC3  
HDAC8  
PSMD12  
RAD21  
CDH23  
XYLT1  
ARMC5  
SMC1A  
SLC7A7  
SMC3  
PCNT  
ARL14EP  
BPTF  
FMR1  
NIPBL  
ZBTB20  
KMT2A  
DYRK1B  
APMAP  
IGF2R  
GART  
PAICS  
LEPQTL1  
PDHX  
DYRK3  
IK  
P2RX1  
PWRN1

SNORD116-1  
HERC2  
IPW  
SNORD115-1  
NPAP1  
PWAR1  
MKRN3-AS1  
RTP4  
HSP90B1  
CH25H  
HLA-A  
NPHS2  
IRAK1BP1  
ZDHHC24  
SYNGAP1  
ND5  
NDUFA12  
SLCO4C1  
TTC4  
GREM1  
ADIG  
DKK1  
NUDC  
AHDC1  
PIGX  
COX6C  
LYST  
GPC3  
SERPINB1  
HCRTR2  
HTR1A  
AOMS3  
BMIQ20  
AOMS1  
COH1  
BMIQ9  
WTS  
BMIQ4  
BMIQ10  
OB AIRH  
MORMS  
BMIQ12  
BMIQ14  
OBHD  
LEPD  
LEPRD  
BMIQ18  
MOSPGF  
RDOB

CHOPS  
MRD39  
SINO  
BMIQ19  
CHUJANS  
AOMS4  
BMIQ8  
BMIQ11  
BMIQ7  
SSOS  
TP53INP2  
PWS  
BMIQ1  
ALMS  
BMIQ13  
T2D  
AS  
BBS6  
BBS3  
CLABARS  
PCOS1  
PHP1A  
SMS  
MRXSC  
CELA2A  
GBD1  
UMS  
CRPT1  
BFLS  
MRXHF1  
MRT13  
BBS16  
BBS17  
BBS19  
IGHD4  
NOS2A  
MTCYB  
CLMP  
ACH  
CWS1  
AIMAH1  
MRXS11  
FXS  
CDLS5  
JBTS8  
ADIPQTL1  
ACNINV2

---

## Supplementary Table S3

A list of the overlapping 116 genes between SEA and STP

PAOX  
DNM1  
PAM  
ADH1B  
CA3  
CES2  
CA6  
ADH1C  
CA5B  
ADH1A  
CA5A  
EPHX1  
CA4  
CA14  
CA7  
HAO1  
FAAH  
PHF8  
GSTK1  
KDM2A  
SLC22A6  
KDM4A  
GABBR1  
KDM5C  
ERN1  
NQO2  
MTNR1B  
MTNR1A  
PPARA  
LPAR6  
FABP3  
LTB4R  
ACP1  
HMGCR  
RARB  
CDC25B  
PTGER2  
EPHX2  
THRB  
GSR  
THRA  
S1PR3  
CDC25A  
S1PR4  
NAAA  
POLB



PRKCA  
PLA2G2A  
HSD17B3  
S1PR5  
PPARG  
TBXA2R  
PTGER4  
PTGIR  
PLA2G4A  
FFAR4  
FABP4  
PTGFR  
PPARD  
S1PR1  
TRPV1  
CNR1  
PDCD4  
MGLL  
CNR2  
PRKCE  
LPAR5  
ALOX12  
TOP1  
ATP12A  
SQLE  
LDLR  
GLA  
CCND3  
IARS  
PTPRC  
LSS  
FNTB  
FNTA  
ICMT  
FDFT1  
PHLPP1  
BCHE  
AKT1  
CYP17A1  
NPC1L1  
GPBAR1  
SRD5A2  
SHBG  
CDC45  
G6PD  
SRD5A1  
SERPINA6  
VDR  
NR1H3

NR1H4  
AR  
ESR2  
CYP24A1  
RORA  
SREBF2  
ESR1  
CA2  
CA1  
CYP19A1  
NR1H2  
RORC  
GBA2  
PTPN2  
CD81  
PTPN1  
HSD11B2  
AKR1B10  
PTPN6  
PTPRF  
HSD11B1

---

## **Supplementary Table S4**

**A list of the overlapping 64 genes between SEA and STP**

PAM  
ADH1B  
CA3  
CES2  
CA5A  
CA4  
FAAH  
GSTK1  
SLC22A6  
ERN1  
MTNR1B  
PPARA  
FABP3  
ACP1  
THRB  
GSR  
THRA  
NAAA  
PRKCA

PLA2G2A  
PPARG  
TBXA2R  
PLA2G4A  
FFAR4  
FABP4  
PPARD  
TRPV1  
CNR1  
PDCD4  
MGLL  
CNR2  
LPAR5  
ALOX12  
LDLR  
PTPRC  
FDFT1  
PHLPP1  
BCHE  
AKT1  
CYP17A1  
NPC1L1  
GPBAR1  
SHBG  
G6PD  
SRD5A1  
SERPINA6  
VDR  
NR1H3  
NR1H4  
AR  
ESR2  
CYP24A1  
SREBF2  
ESR1  
CYP19A1  
NR1H2  
RORC  
PTPN2

CD81

PTPN1

HSD11B2

PTPN6

PTPRF

HSD11B1
